# Supplementary material
Source: PubMed Central journal article supplement (PMC9126061)
Supplement: NIHMS1788667-supplement-Supporting_Information.pdf [file NIHMS1788667-supplement-Supporting_Information.pdf]

## **Supporting Information**

### **Virus Mimicking Polymer Nanoparticles Targeting CD169<sup>+</sup> Macrophages as Long-acting Nanocarriers for Combination Antiretrovirals**

Behnaz Eshaghi,<sup>1</sup> Josiane Fofana,<sup>2</sup> Sarah B. Nodder,<sup>2</sup> Suryaram Gummuluru,<sup>2,\*</sup> and

Björn M. Reinhard<sup>1,\*</sup>

<sup>1</sup>Departments of Chemistry and The Photonics Center, Boston University, Boston, MA 02215,  
United States

<sup>2</sup>Department of Microbiology, Boston University School of Medicine, Boston, MA 02118,  
United States

Suryaram Gummuluru (rgummulu@bu.edu)

Björn M. Reinhard (bmr@bu.edu)

## Additional Methods Section

**RPV and CAB release kinetics determination.** The release data were fitted using zero- and first-order, Higuchi. Zero-order model is described with the equation:  $Q_t = Q_0 + K_0t$ , where  $Q_t$  is the amount of drug released at time  $t$ ,  $Q_0$  is the initial amount of drug, and  $K_0$  is the zero order release constant. In this model, the data are plotted as percentage of drug released *versus* time. First-order model is expressed with the equation:  $\log Q_t = \log Q_0 - K_1t / 2.303$ , where  $Q_t$  is the amount of drug released at time  $t$ ,  $Q_0$  is the initial amount of drug, and  $K_1$  is the first order release constant. In this model, the data are plotted as log of percentage of the drug remaining *versus* time. Higuchi model is described with the equation:  $Q_t = K_H t^{1/2}$ , where  $Q_t$  is the amount of drug released at time  $t$ , and  $K_H$  is Higuchi dissolution constant. In this model, the data are plotted as percentage of the drug released *versus* square root of the time.

**Table S1.** Encapsulation efficiency and drug loading in DOPS PLA and GM3 PLGA NPs.

| NP Type      | Drug | Encapsulation Efficiency (%) | Drug Loading (%) |
|--------------|------|------------------------------|------------------|
| DOPS PLA NPs | RPV  | 38.1 ± 3.3 %                 | 2.2 ± 0.1 %      |
| DOPS PLA NPs | CAB  | 6.0 ± 0.7 %                  | 15.6 ± 1.90 %    |
| GM3 PLGA NPs | RPV  | 33.9 ± 1.2 %                 | 1.1 ± 0.1 %      |
| GM3 PLGA NPs | CAB  | 8.3 ± 0.7 %                  | 14.6 ± 1.8 %     |

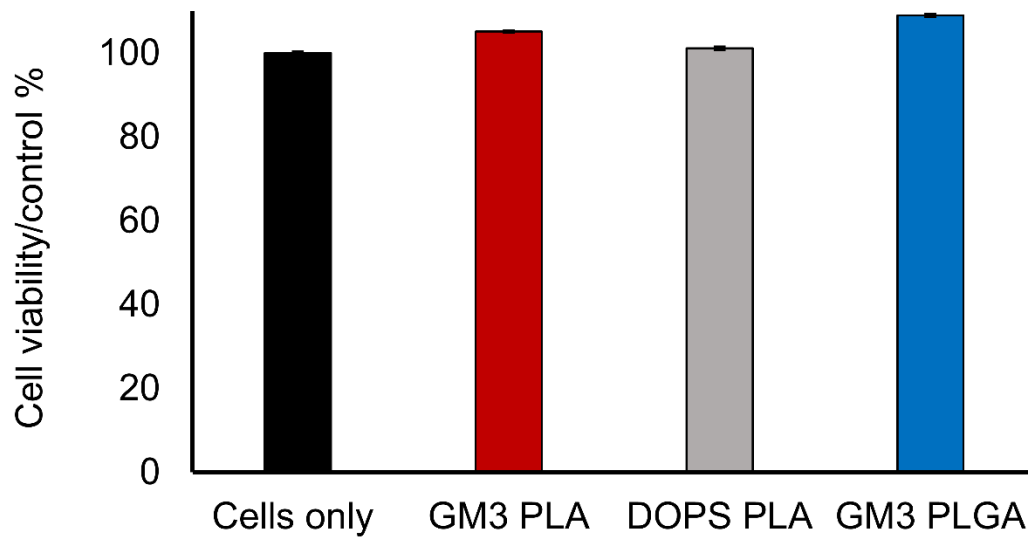

**Figure S1.** MTT cell viability assay of RPV and CAB loaded GM3 PLA, DOPS PLA, and GM3 PLGA NPs in CD169<sup>+</sup> MDMs. Cell viability was assessed after 5 days incubation following a 4 h NP incubation at a concentration of  $1 \times 10^{12}$  NPs/mL, corresponding to approximately 14  $\mu$ M RPV and 148  $\mu$ M CAB.

**Table S2.** IC<sub>50</sub> values of different conditions based on RPV and CAB concentrations. Error bars represent standard error of the mean (SEM) of 3 replicates.

| Conditions             | IC <sub>50</sub> (RPV) | Conditions             | IC <sub>50</sub> (CAB) |
|------------------------|------------------------|------------------------|------------------------|
| Free RPV               | 0.7 ± 0.3 nM           | Free CAB               | 2.0 ± 0.3 nM           |
| Free RPV + CAB         | 0.3 ± 0.1 nM           | Free RPV + CAB         | 1.8 ± 0.1 nM           |
| RPV + CAB GM3 PLA NPs  | 0.2 ± 0.04 nM          | RPV + CAB GM3 PLA NPs  | 1.4 ± 0.3 nM           |
| RPV + CAB GM3 PLGA NPs | 0.1 ± 0.03 nM          | RPV + CAB GM3 PLGA NPs | 0.3 ± 0.1 nM           |
| RPV + CAB DOPS PLA NPs | 0.7 ± 0.3 nM           | RPV + CAB DOPS PLA NPs | 1.1 ± 0.1 nM           |

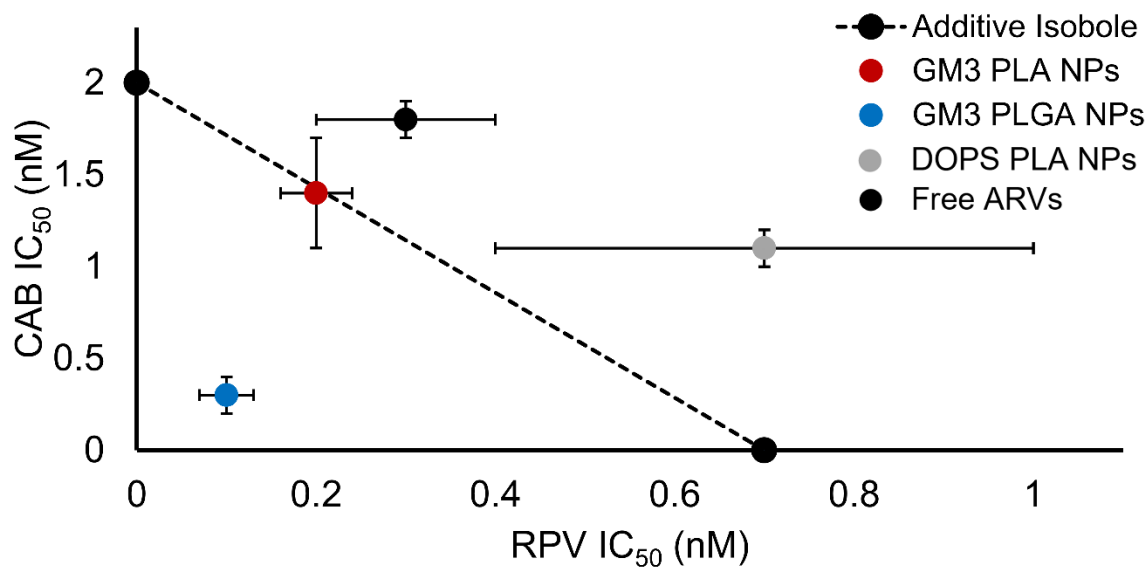

**Figure S2.** Isobologram analysis of RPV and CAB co-encapsulated GM3 PLA, GM3 PLGA, and DOPS PLA NPs as well as free ARVs. An isobologram is spanned using the individual IC<sub>50</sub> values of RPV (x-axis) and CAB (y-axis).<sup>1-2</sup> The IC<sub>50</sub> values of the pure compounds define the x,y intercepts of a line formed by all IC<sub>50</sub> values corresponding to simple additive interactions of the two compounds. This line is referred to as the “additive isobole”. The additive isobole is shown using a dashed line. The localization of data points below and above the additive isobole demonstrate the synergism and antagonism, respectively. In the current case, the data show only small differences, that can be positive or negative relative to the additive isobole and lack a systematic trend.

An alternative strategy for quantifying drug synergism is based on the combination index (CI).<sup>2</sup> The CI is defined as:  $CI = a/A + b/B$ , where a (b) is the IC<sub>50</sub> value for the combination of the two drugs based on the concentration of drug 1 (drug 2), and A (B) is the IC<sub>50</sub> values of drug 1 (drug 2) alone. A CI equals to 1 is characteristic of simple additive interactions, whereas a CI value less than 1 indicates synergism.<sup>2</sup> We obtained a CI of 0.99 for GM3 PLA NPs, 0.29 for GM3 PLGA NPs, 1.55 for DOPS PLA NPs, and 1.33 for free ARVs.

**Table S3.** Percentages of RPV released at different temperatures.

| Time   | % of RPV Released<br>@ 4 °C | % of RPV Released<br>@ RT | % of RPV Released<br>@ 37 °C |
|--------|-----------------------------|---------------------------|------------------------------|
| 0 h    | 0.0                         | 0.0                       | 0.0                          |
| 4 h    | 15.1 ± 5.8                  | 15.4 ± 4.0                | 15.4 ± 1.5                   |
| 8 h    | 16.9 ± 0.4                  | 18.3 ± 3.2                | 19.6 ± 5.9                   |
| 12 h   | 20.6 ± 1.6                  | 24.8 ± 0.8                | 24.6 ± 3.0                   |
| Day 1  | 23.8 ± 2.8                  | 30.1 ± 10.5               | 23.5 ± 3.8                   |
| Day 2  | 28.3 ± 3.4                  | 31.4 ± 5.0                | 46.3 ± 5.1                   |
| Day 3  | 27.2 ± 3.8                  | 35.7 ± 10.1               | 48.0 ± 3.8                   |
| Day 4  | 30.5 ± 7.3                  | 29.8 ± 4.1                | 56.2 ± 1.9                   |
| Day 5  | 17.0 ± 4.0                  | 30.0 ± 4.7                | 61.7 ± 3.8                   |
| Day 6  | 19.8 ± 2.5                  | 32.2 ± 0.5                | 59.6 ± 1.9                   |
| Day 7  | 25.7 ± 3.6                  | 23.7 ± 1.1                | 68.0 ± 6.2                   |
| Day 10 | 22.1 ± 0.6                  | 31.0 ± 1.6                | 78.8 ± 4.7                   |
| Day 14 | 20.0 ± 4.1                  | 32.6 ± 1.6                | 80.1 ± 2.8                   |
| Day 21 | 30.8 ± 6.3                  | 39.1 ± 1.0                | 92.3 ± 1.8                   |
| Day 28 | 33.5 ± 3.5                  | 29.6 ± 2.6                | 92.2 ± 0.6                   |

**Table S4.** Percentages of CAB released at different temperatures.

| Time   | % of CAB Released<br>@ 4 °C | % of CAB Released<br>@ RT | % of CAB Released<br>@ 37 °C |
|--------|-----------------------------|---------------------------|------------------------------|
| 0 h    | 0.0                         | 0.0                       | 0.0                          |
| 4 h    | 16.5 ± 6.6                  | 14.5 ± 1.3                | 21.7 ± 2.6                   |
| 8 h    | 18.9 ± 8.4                  | 18.2 ± 4.6                | 44.5 ± 2.3                   |
| 12 h   | 21.5 ± 2.0                  | 29.6 ± 0.2                | 59.9 ± 2.6                   |
| Day 1  | 28.0 ± 3.2                  | 49.1 ± 7.2                | 90.5 ± 0.9                   |
| Day 2  | 44.6 ± 8.5                  | 74.3 ± 3.9                | 97.6 ± 0.3                   |
| Day 3  | 45.8 ± 3.8                  | 85.6 ± 4.1                | 97.7 ± 0.2                   |
| Day 4  | 60.0 ± 10.3                 | 94.8 ± 0.5                | 97.3 ± 0.1                   |
| Day 5  | 55.8 ± 8.0                  | 96.2 ± 0.3                | 96.3 ± 1.2                   |
| Day 6  | 77.0 ± 1.8                  | 97.5 ± 0.2                | 97.5 ± 0.1                   |
| Day 7  | 75.5 ± 4.7                  | 97.0 ± 0.3                | 98.6 ± 0.1                   |
| Day 10 | 89.5 ± 2.4                  | 98.3 ± 0.2                | 98.6 ± 0.2                   |
| Day 14 | 94.5 ± 1.3                  | 97.5 ± 0.3                | 98.2 ± 0.0                   |
| Day 21 | 93.9 ± 1.1                  | 97.5 ± 0.2                | 98.7 ± 0.2                   |
| Day 28 | 96.6 ± 0.4                  | 97.8 ± 0.2                | 98.6 ± 0.1                   |



**Table S5.** Remaining RPV concentration in GM3 PLA NPs over the release period.

| Time   | Remaining RPV<br>( $\mu\text{g/mL}$ )<br>@ 4 °C | Remaining RPV<br>( $\mu\text{g/mL}$ )<br>@ RT | Remaining RPV<br>( $\mu\text{g/mL}$ )<br>@ 37 °C |
|--------|-------------------------------------------------|-----------------------------------------------|--------------------------------------------------|
| 0 h    | 19.5 $\pm$ 1.8                                  | 35.7 $\pm$ 4.3                                | 27.6 $\pm$ 3.0                                   |
| 4 h    | 16.6 $\pm$ 2.9                                  | 30.2 $\pm$ 2.6                                | 23.2 $\pm$ 2.2                                   |
| 8 h    | 16.2 $\pm$ 0.6                                  | 29.0 $\pm$ 3.6                                | 21.7 $\pm$ 1.6                                   |
| 12 h   | 15.5 $\pm$ 1.7                                  | 23.6 $\pm$ 5.7                                | 20.7 $\pm$ 2.2                                   |
| Day 1  | 14.9 $\pm$ 1.3                                  | 24.9 $\pm$ 4.7                                | 20.8 $\pm$ 1.4                                   |
| Day 2  | 14.0 $\pm$ 0.9                                  | 24.5 $\pm$ 3.9                                | 14.4 $\pm$ 0.7                                   |
| Day 3  | 14.2 $\pm$ 1.7                                  | 22.5 $\pm$ 4.1                                | 14.6 $\pm$ 2.5                                   |
| Day 4  | 13.6 $\pm$ 1.2                                  | 24.9 $\pm$ 3.2                                | 11.9 $\pm$ 1.0                                   |
| Day 5  | 16.1 $\pm$ 1.6                                  | 25.0 $\pm$ 3.8                                | 10.3 $\pm$ 0.8                                   |
| Day 6  | 15.8 $\pm$ 1.9                                  | 25.6 $\pm$ 1.8                                | 11.3 $\pm$ 1.6                                   |
| Day 7  | 14.4 $\pm$ 0.9                                  | 29.2 $\pm$ 4.7                                | 9.4 $\pm$ 2.4                                    |
| Day 10 | 15.2 $\pm$ 2.3                                  | 24.5 $\pm$ 3.0                                | 5.7 $\pm$ 1.4                                    |
| Day 14 | 15.6 $\pm$ 3.4                                  | 24.1 $\pm$ 3.3                                | 5.7 $\pm$ 1.3                                    |
| Day 21 | 13.5 $\pm$ 2.2                                  | 21.6 $\pm$ 2.3                                | 2.0 $\pm$ 0.4                                    |
| Day 28 | 13.2 $\pm$ 1.9                                  | 25.2 $\pm$ 3.4                                | 2.1 $\pm$ 0.2                                    |

**Table S6.** Remaining CAB concentration in GM3 PLA NPs over the release period.

| Time   | Remaining CAB<br>( $\mu\text{g/mL}$ )<br>@ 4 °C | Remaining CAB<br>( $\mu\text{g/mL}$ )<br>@ RT | Remaining CAB<br>( $\mu\text{g/mL}$ )<br>@ 37 °C |
|--------|-------------------------------------------------|-----------------------------------------------|--------------------------------------------------|
| 0      | 474.1 $\pm$ 26.4                                | 434.4 $\pm$ 14.1                              | 497.5 $\pm$ 32.6                                 |
| 4 h    | 391.0 $\pm$ 9.6                                 | 371.1 $\pm$ 7.0                               | 387.2 $\pm$ 12.9                                 |
| 8 h    | 384.7 $\pm$ 56.3                                | 354.0 $\pm$ 13.6                              | 276.4 $\pm$ 22.0                                 |
| 12 h   | 373.6 $\pm$ 29.6                                | 221.0 $\pm$ 73.4                              | 197.5 $\pm$ 7.3                                  |
| Day 1  | 342.7 $\pm$ 29.6                                | 223.3 $\pm$ 36.2                              | 48.0 $\pm$ 7.7                                   |
| Day 2  | 268.3 $\pm$ 50.3                                | 110.8 $\pm$ 15.3                              | 12.4 $\pm$ 2.6                                   |
| Day 3  | 259.9 $\pm$ 31.2                                | 61.2 $\pm$ 16.4                               | 11.1 $\pm$ 0.6                                   |
| Day 4  | 155.9 $\pm$ 57.6                                | 22.4 $\pm$ 1.7                                | 13.4 $\pm$ 0.9                                   |
| Day 5  | 213.7 $\pm$ 44.2                                | 16.6 $\pm$ 1.0                                | 19.6 $\pm$ 7.2                                   |
| Day 6  | 110.3 $\pm$ 14.6                                | 10.9 $\pm$ 0.4                                | 12.6 $\pm$ 1.3                                   |
| Day 7  | 118.6 $\pm$ 25.9                                | 12.8 $\pm$ 1.3                                | 7.1 $\pm$ 0.1                                    |
| Day 10 | 48.7 $\pm$ 10.5                                 | 7.4 $\pm$ 0.7                                 | 7.4 $\pm$ 1.5                                    |
| Day 14 | 18.2 $\pm$ 5.8                                  | 10.7 $\pm$ 1.3                                | 9.1 $\pm$ 0.4                                    |
| Day 21 | 22.4 $\pm$ 6.0                                  | 10.8 $\pm$ 0.6                                | 6.5 $\pm$ 1.2                                    |
| Day 28 | 15.8 $\pm$ 1.8                                  | 9.6 $\pm$ 0.6                                 | 6.8 $\pm$ 0.6                                    |

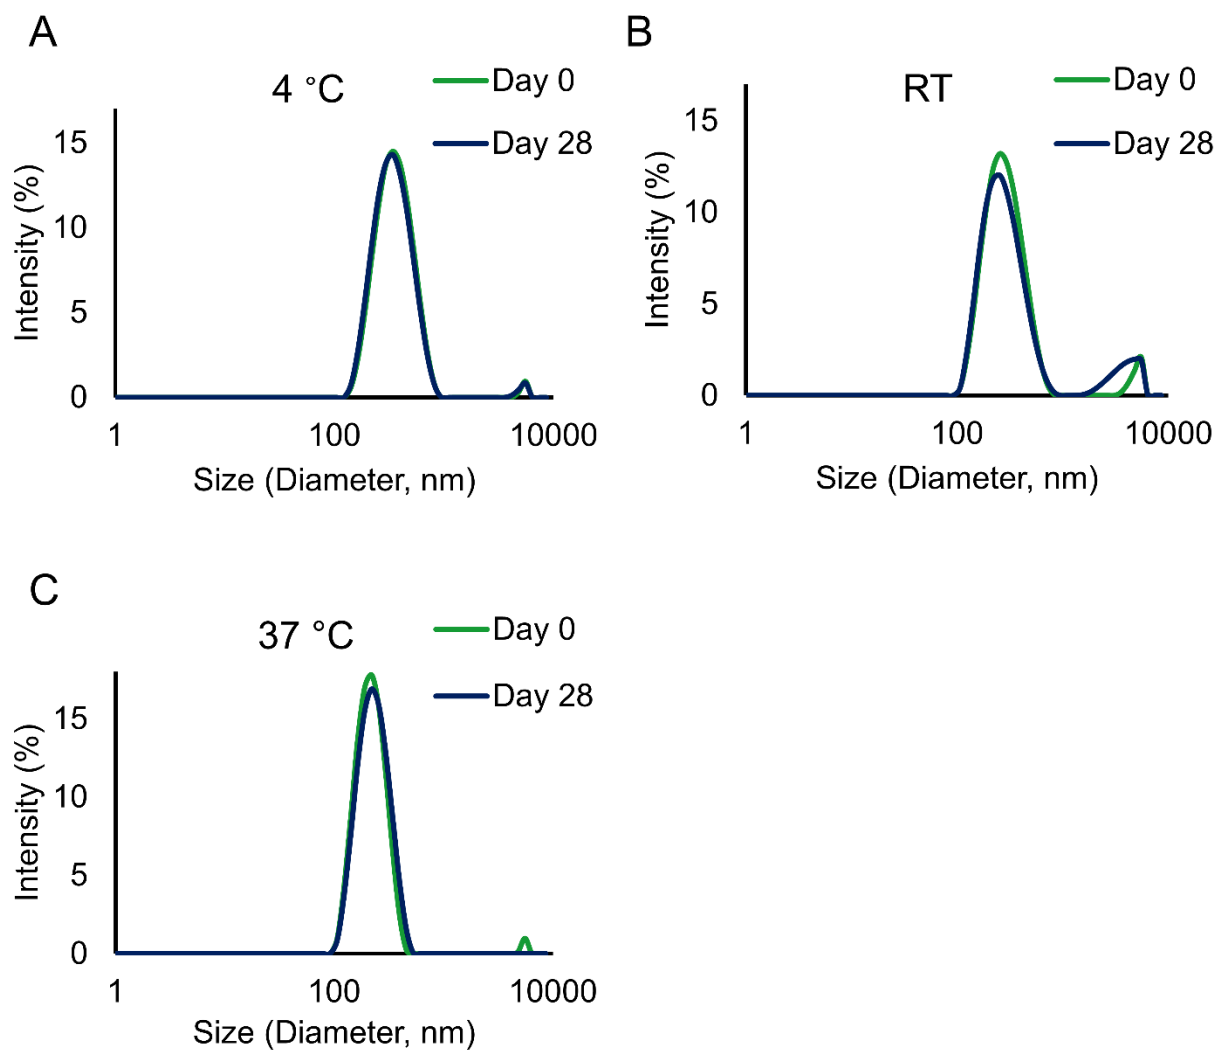

**Figure S3.** Hydrodynamic size of GM3 PLA NPs. **A)** Intensity statistics of size measurements of GM3 PLA NPs at 4 °C on day 0 and day 28. **B)** Intensity statistics of size measurements of GM3 PLA NPs at RT on day 0 and day 28. **C)** Intensity statistics of size measurements of GM3 PLA NPs at 37 °C on day 0 and day 28.

**Table S7.** Zero- and first-order, and Higuchi fits.

| Drug \ Model | Zero order                            | First order                              | Higuchi                                |
|--------------|---------------------------------------|------------------------------------------|----------------------------------------|
| RPV @ 4 °C   | $y = 0.43x + 13.87$<br>$R^2 = 0.934$  | $y = -0.0023x + 1.94$<br>$R^2 = 0.9396$  | $y = 3.11x + 8.81$<br>$R^2 = 0.9646$   |
| RPV @ RT     | $y = 0.73x + 13.32$<br>$R^2 = 0.9276$ | $y = -0.0041x + 1.94$<br>$R^2 = 0.9377$  | $y = 5.27x + 4.75$<br>$R^2 = 0.9591$   |
| RPV @ 37 °C  | $y = 0.34x + 19.63$<br>$R^2 = 0.8991$ | $y = -0.0025x + 1.9121$<br>$R^2 = 0.917$ | $y = 4.90x + 6.07$<br>$R^2 = 0.956$    |
| CAB @ 4 °C   | $y = 0.38x + 18.32$<br>$R^2 = 0.9153$ | $y = -0.0027x + 1.92$<br>$R^2 = 0.9224$  | $y = 5.05x + 5.14$<br>$R^2 = 0.9607$   |
| CAB @ RT     | $y = 1.79x + 6.38$<br>$R^2 = 0.9857$  | $y = -0.0117x + 1.99$<br>$R^2 = 0.9871$  | $y = 12.50x - 13.39$<br>$R^2 = 0.9669$ |
| CAB @ 37 °C  | $y = 4.77x + 3.84$<br>$R^2 = 0.9873$  | $y = -0.0363x + 2.04$<br>$R^2 = 0.9997$  | $y = 26.15x - 30.26$<br>$R^2 = 0.9986$ |

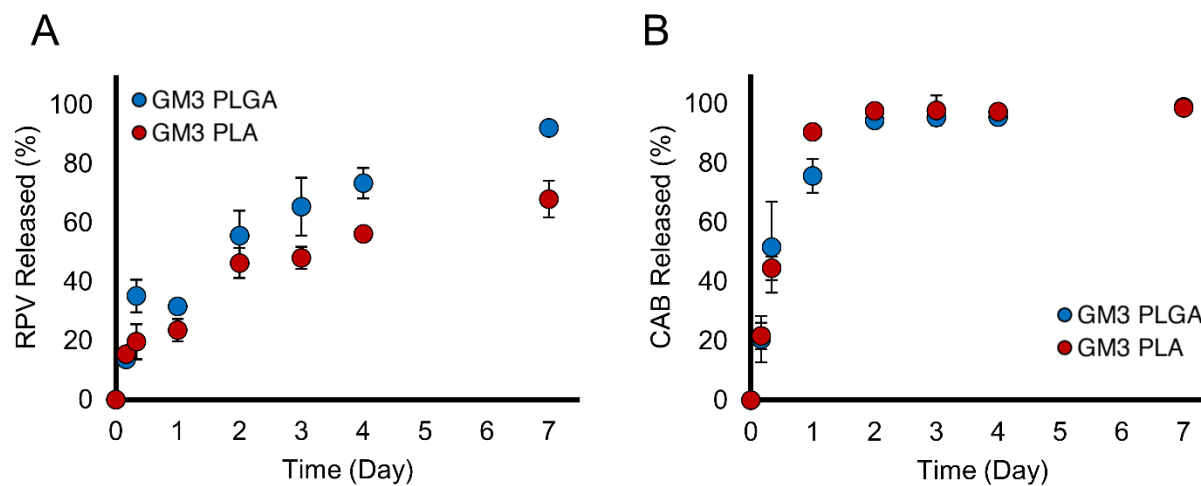

**Figure S4.** RPV and CAB release kinetics in GM3 PLA NPs *versus* GM3 PLGA NPs. **A)** Percentage of the RPV released at 37 °C in 1 × PBS over a time span of 7 days. **B)** Percentage of the CAB released at 37 °C in 1 × PBS over a time span of 7 days.

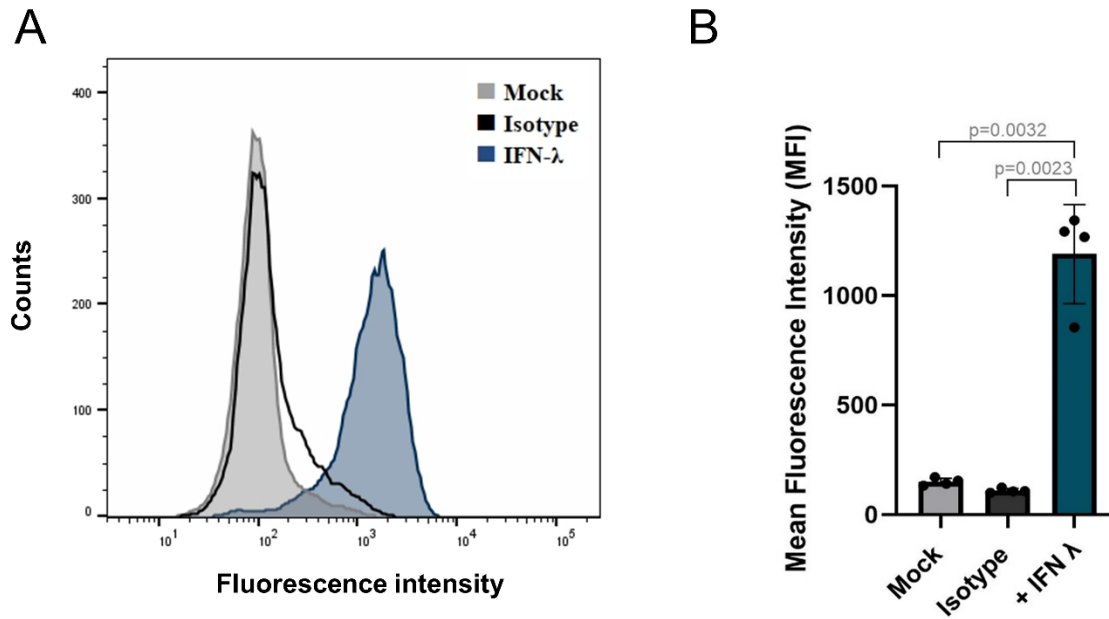

**Figure S5.** CD169 induction by IFN- $\lambda$  in MDMs. **A)** Histogram representative of CD169 staining of MDMs, different conditions inducing mock, isotype, and IFN- $\lambda$  treated are included. **B)** Mean fluorescence intensity (MFI) of CD169 in different conditions presented in a. MDMs were stimulated with IFN- $\lambda$  (5ng/mL) for 48 h, and cell surface expression of CD169 was analyzed by FACS. Results are represented as mean  $\pm$  SEM from 4 donors. Statistical analysis was assessed with a paired t-test.

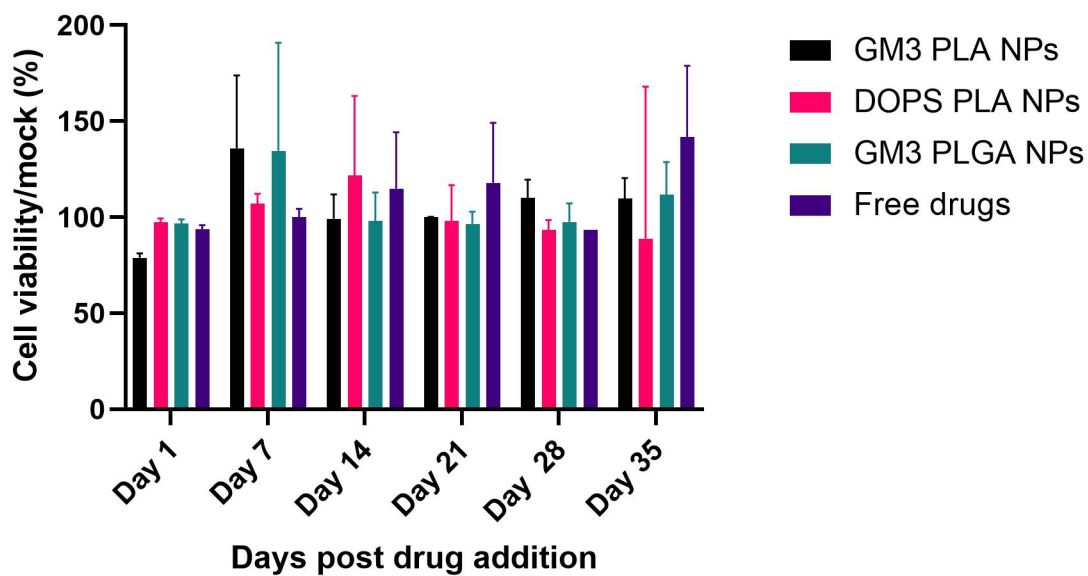

**Figure S6.** Cell viability assessed by MTT assay. Cell viability of CD169<sup>+</sup> MDMs incubated with free ARVs or NPs at 1 $\mu$ M RPV equivalent concentration (CAB concentration varied between 6 to 33  $\mu$ M) for 3 h. After NP treatment, cells were washed and cultured for up to 35 days. The data was normalized to the untreated cells. Results are shown as mean  $\pm$  SEM from cells derived from 2 independent donors.

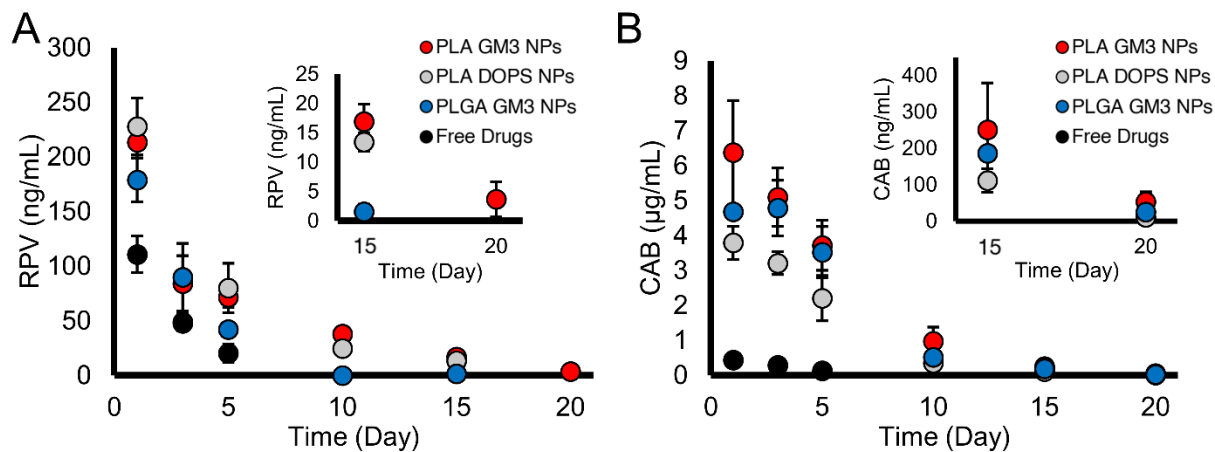

**Figure S7.** Quantification of RPV and CAB released from CD169<sup>+</sup> MDMs into the medium. **A)** RPV concentration in the medium released from CD169<sup>+</sup> MDMs over 20 days, the inset shows the zoomed in view of released RPV after day 15 for better visualization of different NP types. **B)** CAB concentration in the medium released from CD169<sup>+</sup> MDMs over 20 days, the inset shows the zoomed in view of released CAB after day 15 for better visualization of different NP types.



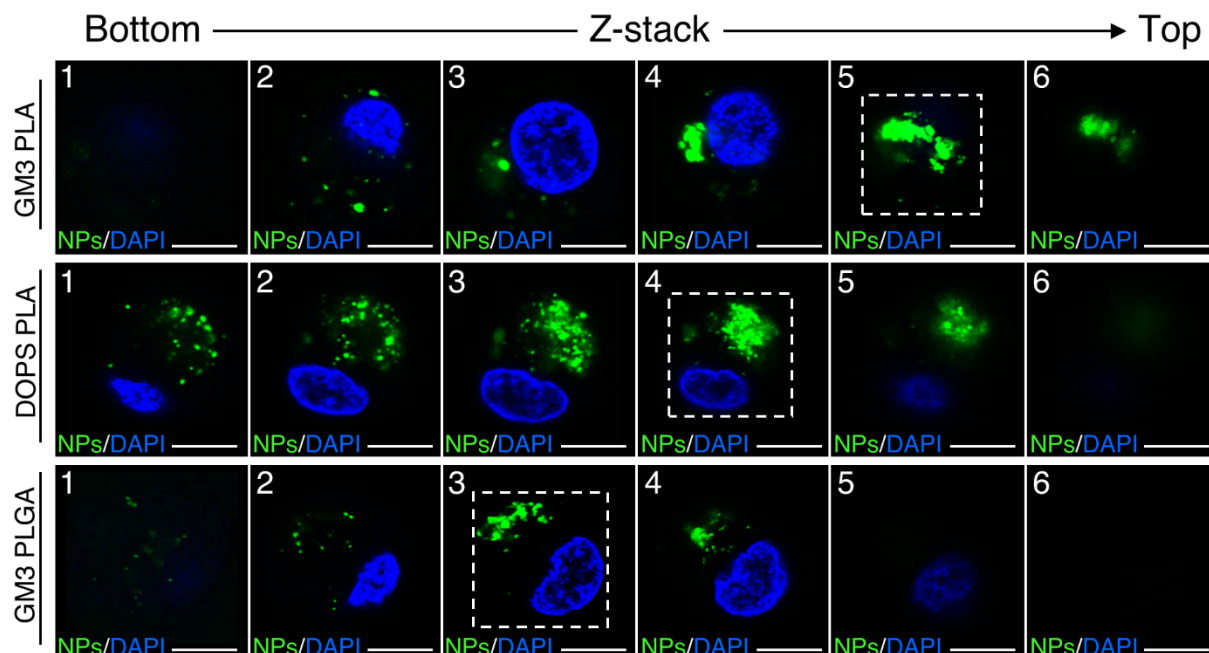

**Figure S8.** Localization of GM3 PLA, DOPS PLA, and GM3 PLGA NPs in CD169<sup>+</sup> MDMs. Confocal z-stack images of CD169<sup>+</sup> MDMs 1 day post NP treatment. The dashed square is used to demonstrate the section with the highest NP-contained area. Z-stack images were collected at 3 μm steps. Scale bar = 10 μm.

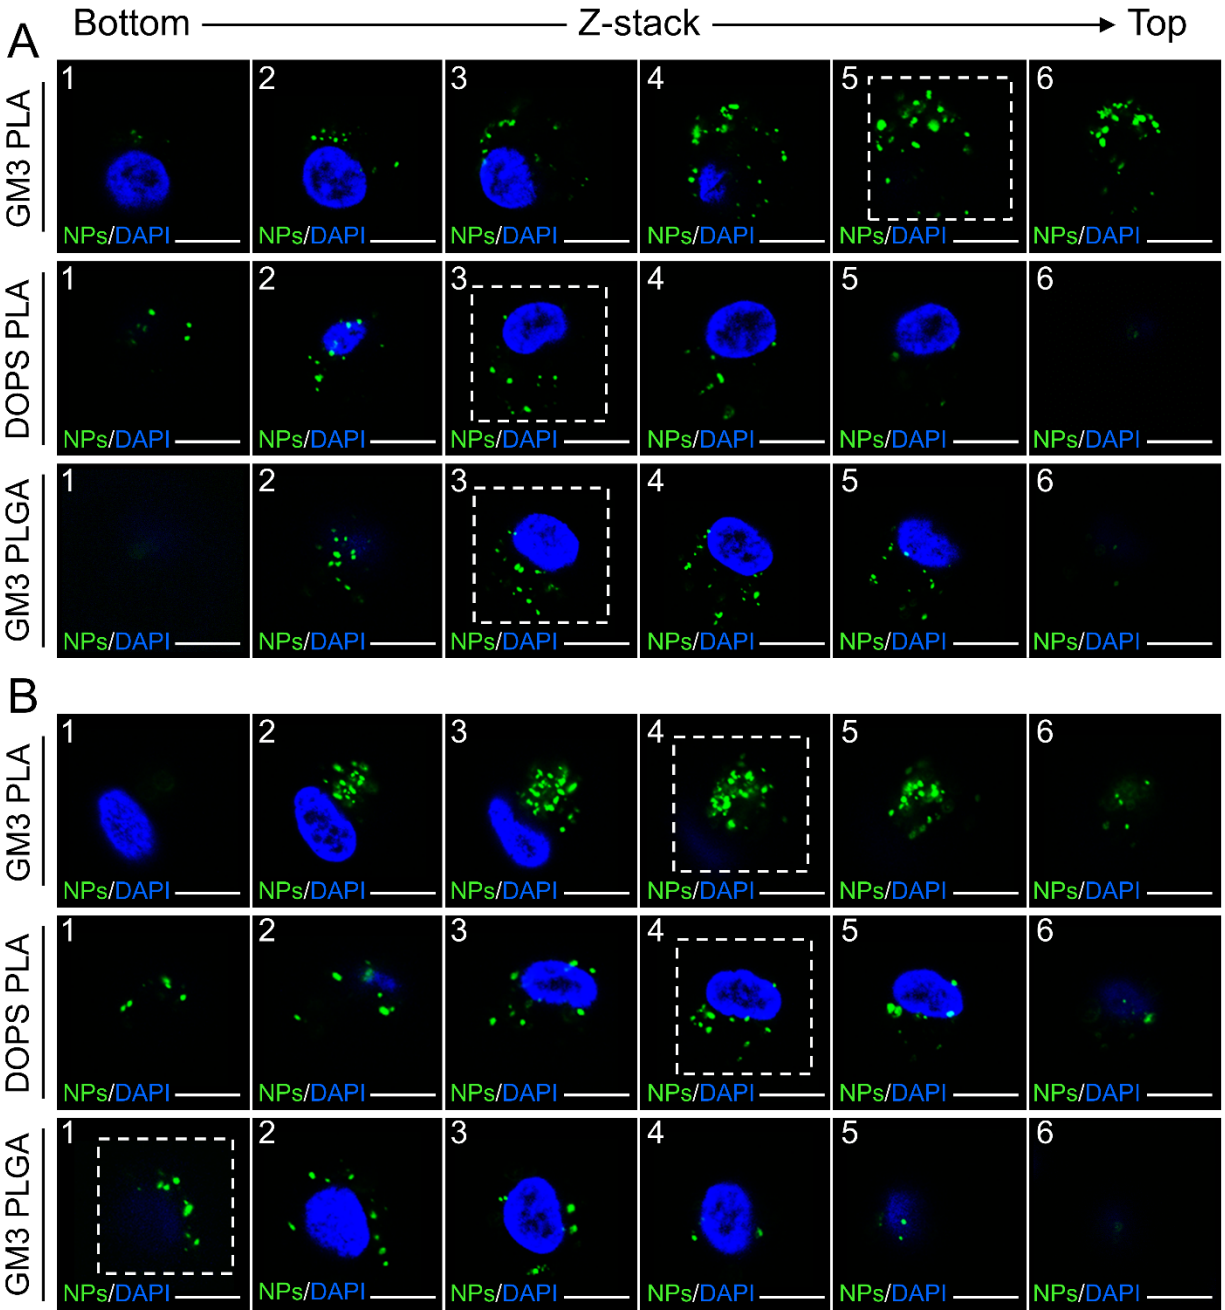

**Figure S9.** Localization of GM3 PLA, DOPS PLA, and GM3 PLGA NPs in CD169<sup>+</sup> MDMs. **A)** Confocal z-stack images of CD169<sup>+</sup> MDMs 15 days post NP treatment. **B)** Confocal z-stack images of CD169<sup>+</sup> MDMs 20 days post NP treatment. The dashed square is used to demonstrate the section with the highest NP-contained area. Z-stack images were collected at 3  $\mu\text{m}$  steps. Scale bar = 10  $\mu\text{m}$ .

**Table S8.** Manders' colocalization coefficients (MCCs) quantification for GM3 PLA NPs.

| Day Post NP Treatments | Day 1          |                | Day 5          |                | Day 10         |                |
|------------------------|----------------|----------------|----------------|----------------|----------------|----------------|
| MCCs                   | M <sub>1</sub> | M <sub>2</sub> | M <sub>1</sub> | M <sub>2</sub> | M <sub>1</sub> | M <sub>2</sub> |
| Marker: CD169          | 0.92 ± 0.05    | 0.53 ± 0.13    | 0.71 ± 0.12    | 0.39 ± 0.22    | 0.73 ± 0.22    | 0.28 ± 0.13    |
| Marker: CD9            | 0.83 ± 0.14    | 0.05 ± 0.03    | 0.66 ± 0.19    | 0.03 ± 0.02    | 0.61 ± 0.18    | 0.01 ± 0.01    |
| Marker: LAMP-1         | 0.27 ± 0.12    | 0.06 ± 0.09    | 0.06 ± 0.06    | 0.002 ± 0.002  | 0.04 ± 0.04    | 0.004 ± 0.004  |
| Day Post NP Treatments | Day 15         |                | Day 20         |                | Day 25         |                |
| MCCs                   | M <sub>1</sub> | M <sub>2</sub> | M <sub>1</sub> | M <sub>2</sub> | M <sub>1</sub> | M <sub>2</sub> |
| Marker: CD169          | 0.56 ± 0.17    | 0.35 ± 0.23    | 0.42 ± 0.29    | 0.34 ± 0.26    | 0.18 ± 0.13    | 0.16 ± 0.22    |
| Marker: CD9            | 0.56 ± 0.26    | 0.01 ± 0.01    | 0.44 ± 0.15    | 0.02 ± 0.01    | 0.16 ± 0.16    | 0.003 ± 0.003  |
| Marker: LAMP-1         | 0.20 ± 0.13    | 0.02 ± 0.01    | 0.16 ± 0.16    | 0.23 ± 0.39    | 0.07 ± 0.08    | 0.01 ± 0.01    |

M<sub>1</sub> describes the overlap of NPs with the respective markers (CD169 or CD9 or LAMP-1) signal, and M<sub>2</sub> quantifies the overlap of the marker (CD169 or CD9 or LAMP-1) signal with the NP signal. M<sub>1</sub> and M<sub>2</sub> values were calculated for 10 cells per staining and NP types, in total 180 cells.

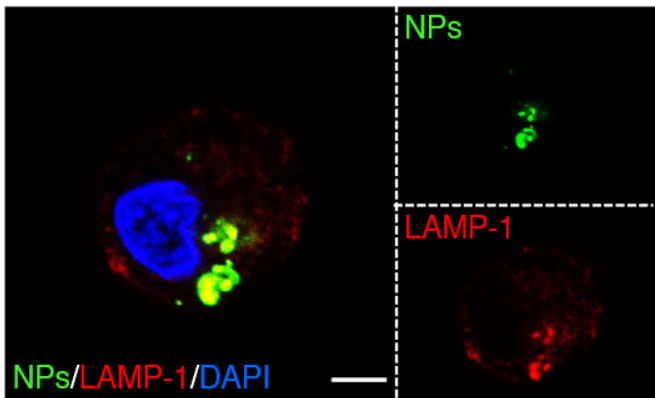

**Figure S10.** Optical colocalization of DOPS PLA NPs and LAMP-1 in CD169<sup>+</sup> MDMs. Single confocal sections of CD169<sup>+</sup> MDMs incubated with DOPS PLA NPs and stained for LAMP-1 on day 1. Scale bar = 5  $\mu$ m. MCCs ( $M_1$  and  $M_2$ ) values were calculated for 19 cells (4 independent donors), and the average of  $M_1$  is  $0.94 \pm 0.03$  and  $M_2$  is  $0.10 \pm 0.04$ .  $M_1$  describes the overlap of NP with the LAMP-1 signal, and  $M_2$  quantifies the overlap of the LAMP-1 with the NP signal.

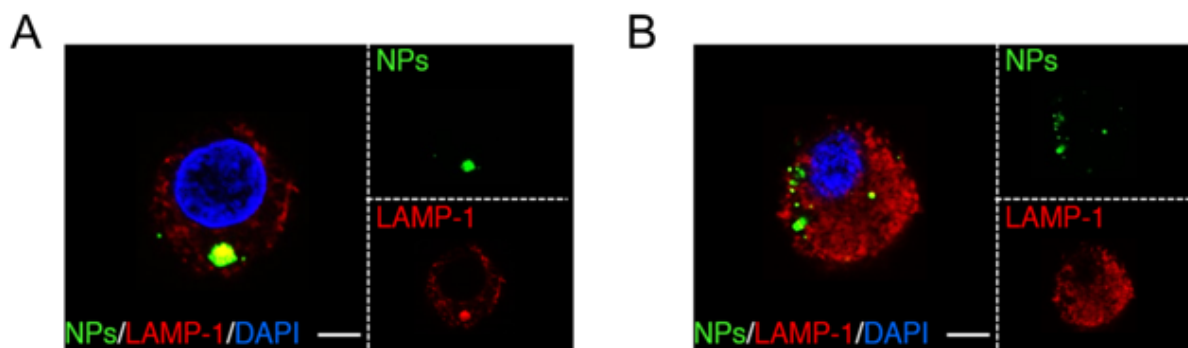

**Figure S11.** Optical colocalization of GM3 PLGA NPs and LAMP-1 in CD169<sup>+</sup> MDMs. Single confocal sections of CD169<sup>+</sup> MDMs incubated with DOPS PLA NPs and stained for LAMP-1 on day 1. A, B were acquired from two different donors. A shows a robust colocalization while the colocalization is weaker for B. Scale bar = 5  $\mu$ m.

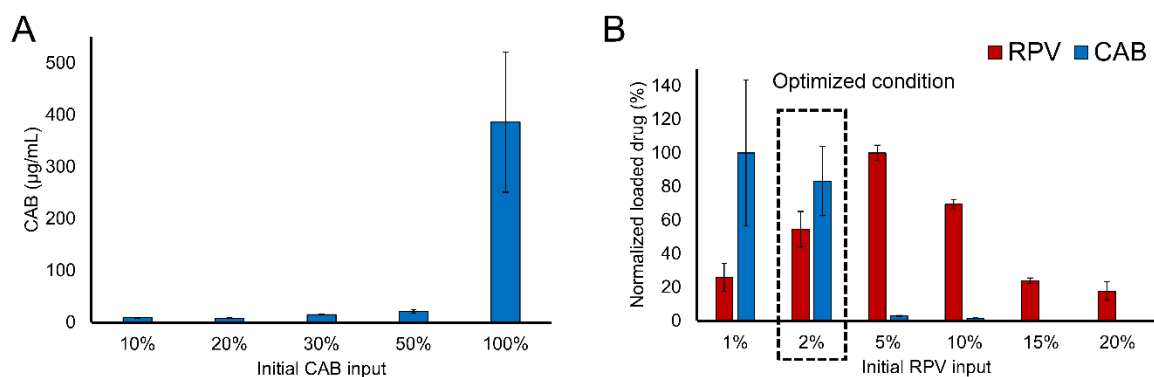

**Figure S12.** Optimized co-loading of RPV and CAB. **A)** CAB concentration in polymer NPs as a function of initial CAB input, the percentage is relative to polymer weight, the highest average loading of CAB obtained using a constant 1:1 weight ratio of CAB : polymer. **B)** By keeping the CAB : polymer ratio constant, the initial RPV input was changed and optimized co-loading of RPV and CAB achieved using 2% of the polymer weight. Further increase in the RPV input concentration resulted in a strong decrease of CAB loading.

## References

1. Tallarida, R. J., Quantitative methods for assessing drug synergism. *Genes & cancer* **2011**, 2 (11), 1003-1008.
2. Fouquier, J.; Guedj, M., Analysis of drug combinations: current methodological landscape. *Pharmacology research & perspectives* **2015**, 3 (3), e00149.
